# Supplementary material for: Self-assembled porous nanoparticles based on silicone polymers with aggregation-induced emission for highly sensitive detection of nitroaromatics
Source: Royal Society of Chemistry journal article supplement (doi:10.1039/d1py01012c), 2021-01-01
Supplement: d1py01012c1.pdf [file d1py01012c1.pdf]

## Supporting Information

### **Self-Assembled Porous Nanoparticles Based on Silicone Polymer with Aggregation-induced Emission for Highly Sensitive Detection of Nitroaromatics**

Xiangzhong Zhao<sup>1,2</sup>, Yan Liang<sup>1,2\*</sup>, Ting Wang<sup>1</sup>, Fangfang Li<sup>2</sup>, Hua Wang<sup>3\*</sup>

1 State Key Laboratory of Biobased Material and Green Papermaking, Qilu University of Technology (Shandong Academy of Sciences), Jinan, Shandong 250353, China

2 College of Food Science and Engineering, Qilu University of Technology (Shandong Academy of Sciences), Jinan, Shandong 250353, China.

3 School of Materials Science and Engineering, Shandong University, Jinan, Shandong 250061, China

Corresponding authors:     liangyan@qlu.edu.cn (Yan Liang)

                                          hwang@sdu.edu.cn (Hua Wang)

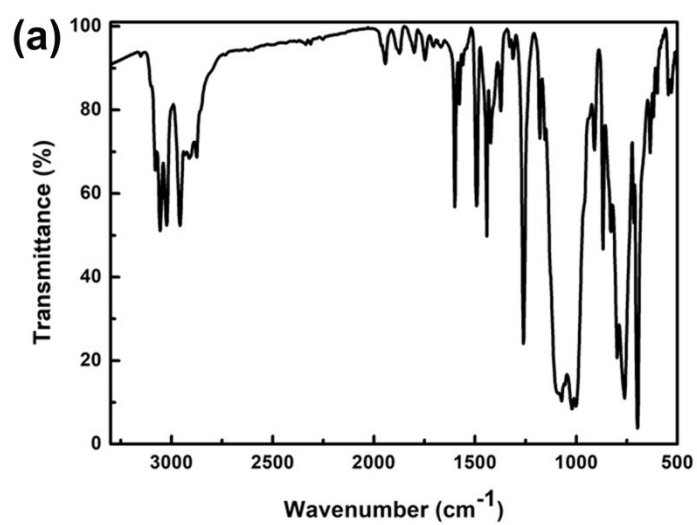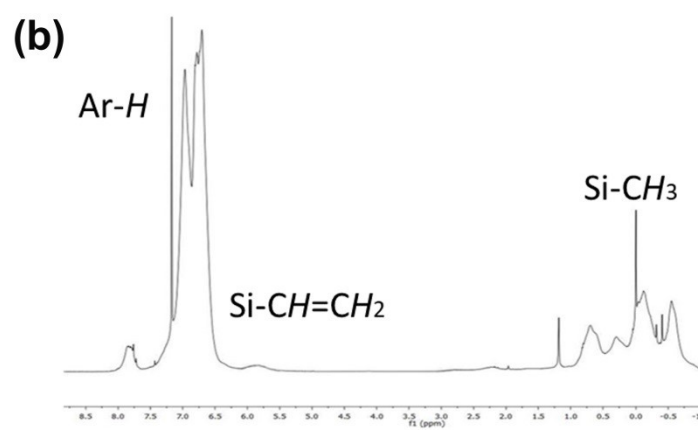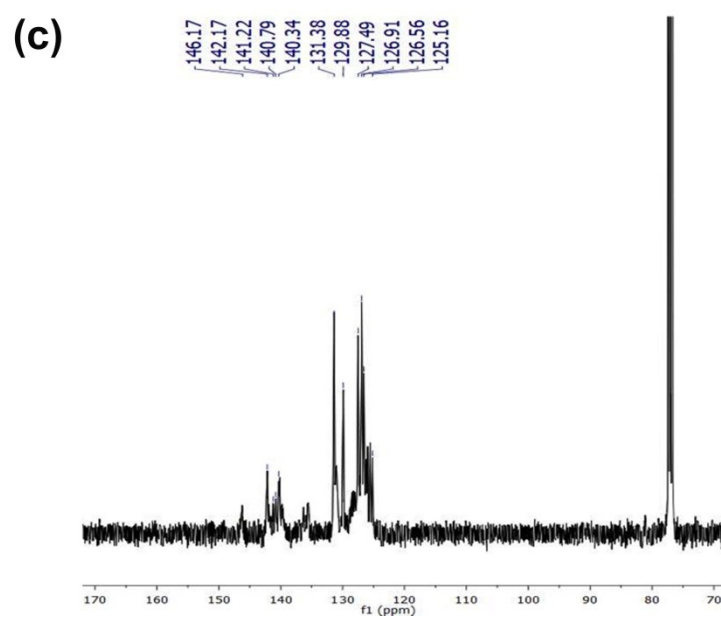

Figure S1. (a) The FT-IR, (b)  $^1\text{H}$  NMR and (c)  $^{13}\text{C}$  NMR spectra of TPB-P

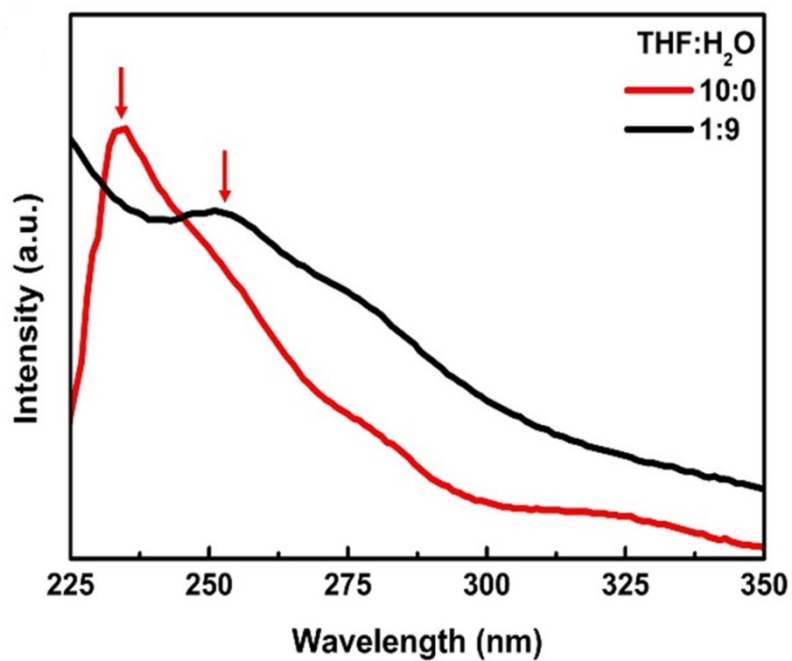

Figure S2. Absorption spectra of **TPB-P** in THF solution and THF/water (1:9) mixed solution

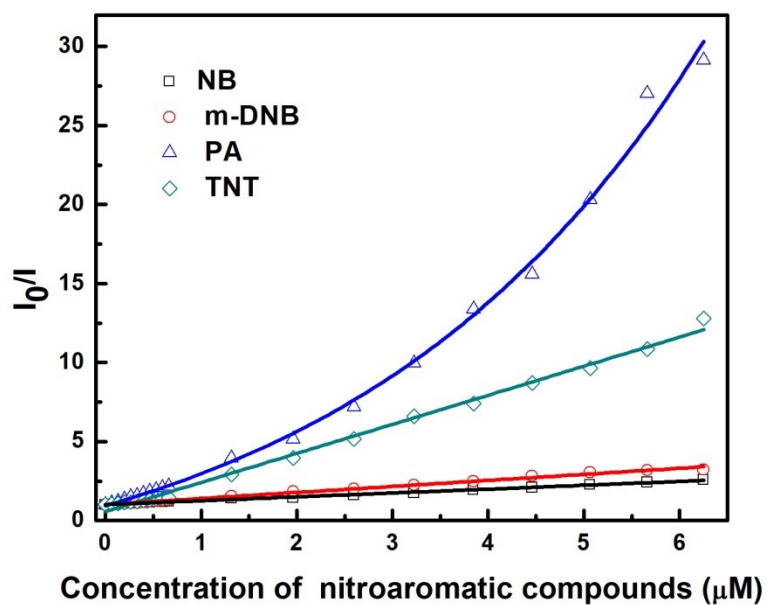

Figure S3. Corresponding Stern-Volmer plots of **TPB-P** nanoparticles in the presence of NB, m-DNB, TNT and PA

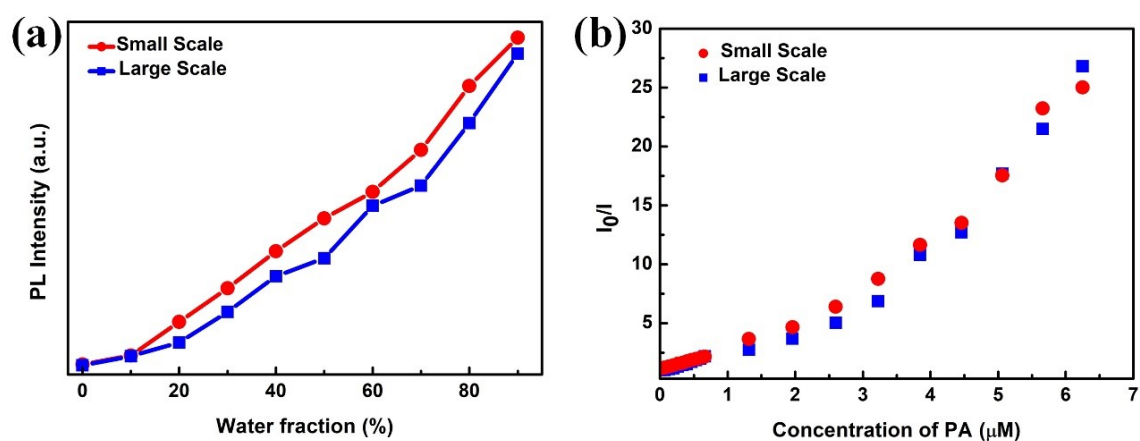

Figure S4. (a) Fluorescence intensities against water fractions and (b) Stern-Volmer curves in the presence of PA of small scale product and large scale product.

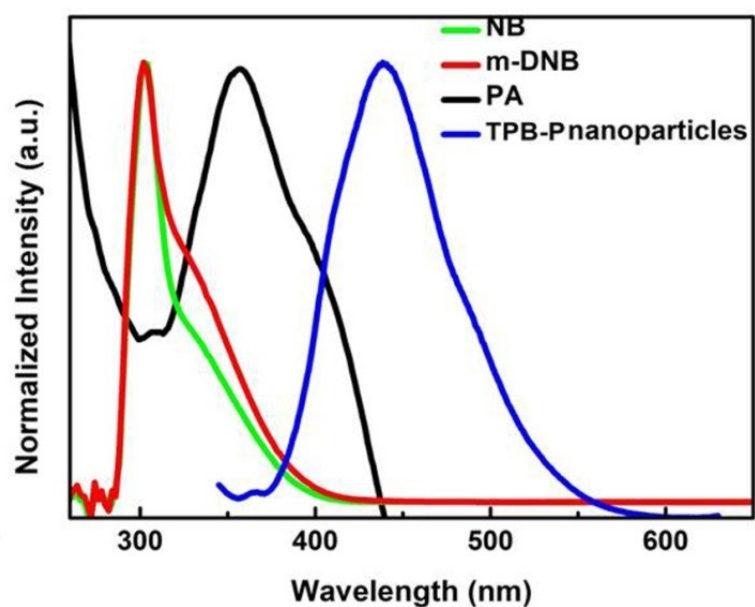

Figure S5. Fluorescence emission spectra of TPB-P nanoparticles and absorption spectra of NB, m-DNB and PA.

Table S1. LoD of PA sensors in references

| Receptor                                                                            | Analyte | Sensor state   | Detecting system                        | Limit of detection (LoD, $\mu\text{M}$ ) | Ref. |
|-------------------------------------------------------------------------------------|---------|----------------|-----------------------------------------|------------------------------------------|------|
| 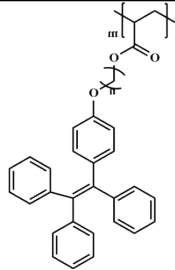   | PA      | Nanoparticle   | THF/H <sub>2</sub> O mixture (1: 9 v/v) | 10.9                                     | [1]  |
|    | PA      | Nano-aggregate | THF/H <sub>2</sub> O mixture (1: 9 v/v) | 0.087                                    | [2]  |
|    | PA      | Nano-aggregate | THF/H <sub>2</sub> O mixture (1:8 v/v)  | 21.8                                     | [3]  |
|  | PA      | Solution       | THF                                     | 3.7                                      | [4]  |
|  | PA      | Nano-aggregate | THF/H <sub>2</sub> O mixture (1: 9 v/v) | 4.37                                     | [5]  |
|  | PA      | Nano-aggregate | THF/H <sub>2</sub> O mixture (1: 9 v/v) | 2.18                                     | [6]  |

|                                                                                   |    |                  |                                                         |        |           |
|-----------------------------------------------------------------------------------|----|------------------|---------------------------------------------------------|--------|-----------|
| 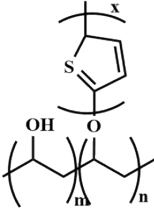 | PA | Nano-aggregate   | DMSO/Ethanol mixture (1: 100 v/v)                       | 0.12   | [7]       |
|  | PA | Nanofibrous film | 100% aqueous media                                      | 0.99   | [8]       |
|  | PA | Solution         | CH <sub>3</sub> OH/ H <sub>2</sub> O mixture (9: 1 v/v) | 4.7    | [9]       |
| <b>TPB-P</b>                                                                      | PA | Solution         | THF                                                     | 0.0178 | This work |
| <b>TPB-P</b>                                                                      | PA | Nano-aggregate   | THF/ H <sub>2</sub> O mixture (1: 9 v/v)                | 0.0048 | This work |

## References

1. H. Zhou, J. S. Li, M. H. Chua, H. Yan, B. Z. Tang and J. W. Xu, *Poly. Chem.*, 2014, **5**, 5628-5637.
2. Q. Wang, M. Chen, B. C. Yao, J. Wang, J. Mei, J. Z. Sun, A. J. Qin and B. Z. Tang, *Macromol. Rapid Commun.*, 2013, **34**, 796-802.
3. J. Wang, B. X. Li, D. H. Xin, R. R. Hu, Z. J. Zhao, A. J. Qin and B. Z. Tang, *Poly. Chem.*, 2017, **8**, 2713-2722.
4. V. Kumar, B. Maiti, M. K. Chini, P. De and S. Satapathi, *Sci. Rep.*, 2019, **9**, 7269.
5. J. Z. Liu, Y. C. Zhong, J. W. Y. Lam, P. Lu, Y. N. Hong, Y. Yu, Y. N. Yue, M. Faisal, H. H. Y. Sung, I. D. Williams, K. S. Wong and B. Z. Tang, *Macromolecules*, 2010, **43**, 4921-4936.
6. W. Z. Yuan, R. R. Hu, J. W. Y. Lam, N. Xie, C. K. W. Jim and B. Z. Tang, *Chem-Eur J.*, 2012, **18**, 2847-2856.
7. P. Dutta, S. Chakravarty and N. S. Sarma, *RSC Adv.*, 2016, **6**, 3680-3689.

8. K. Li, R. H. Yu, C. M. Shi, F. R. Tao, T. D. Li and Y. Z. Cui, *Sens. Actuators, B Chem.*, 2018, **262**, 637-645.
9. Y. Q. Ma, Y. Y. Zhang, L. Kong and J. X. Yang, *CrystEngComm*, 2019, **21**, 94-101.
